# Supplementary material for: Beneficial effects of combinatorial micronutrition on body fat and atherosclerosis in mice
Source: PubMed Central journal article supplement — Cardiovasc Res. 2011 May 28;91(4):732–41. doi: 10.1093/cvr/cvr146 (PMC3156909; doi:10.1093/cvr/cvr146), 2011-05-28
Supplement: supp_cvr146_cvr146supp.pdf [file supp_cvr146_cvr146supp.pdf]

1 **Supplementary Material**

2 **Supplementary Figure 1: Food intake.**

3 (A, B, C) Food intake of Lipistase- or vehicle-treated LDLrKO, LDLrKO-PPAR $\alpha$ KO, and  
4 APOEKO mice monitored over a period of 8 months.

5

6 **Supplementary Figure 2: Effect of Lipistase on 3T3-L1 cell differentiation.**

7 **(A)** Quantification of oil red O assay of 3T3L1 differentiated cells (day 5) treated with the PPAR $\gamma$   
8 ligand Rosiglitazone (Rosi, 1  $\mu$ M), the PPAR $\alpha$  ligand WY-14 643 (WY, 1  $\mu$ M) and Lipistase (Lip,  
9 160 pg/mL). \*  $p < 0.05$ . **(B)** Lipistase effect on mRNA expression levels of genes encoding  
10 adipose-secreted proteins (Leptin, Adiponectin, Resistin and Adipsin), a lipogenic transcription  
11 factor (SREBP-1c) and lipogenic markers (ACC1, FAS and ADFP) during the differentiation of  
12 3T3-L1 cells at the indicated days.

13

14 **Supplementary Figure 3: Effect of Lipistase on the levels of hepatic total cholesterol,  
15 cholesterol esters, and triglycerides.**

16 The levels of the abovementioned lipids were measured in LDLrKO and LDLrKO-PPAR $\alpha$ KO  
17 after a 10 month-treatment with Lipistase.

18

19 **Supplementary Figure 4: Comparative mRNA expression levels of genes involved in fatty acid  
20 uptake, fatty acid catabolism and lipogenesis in muscle, adipose tissue, and liver.**

21 mRNA expression levels of markers for fatty acid uptake, fatty acid catabolism, and lipogenesis  
22 measured in LDLrKO and LDLrKO-PPAR $\alpha$ KO after a 10 month treatment with Lipistase.

23

24 **Supplementary Figure 5: Lipistase increases oxygen consumption in APOEKO mice.**

1 Oxygen consumption measured after a 10 month-treatment with Lipistase (\*p < 0.05; nAPOEKO =  
2 4 per group).

3

4 **Supplementary Figure 6. Athero-protective effects of Lipistase in APOEKO mice.**

5 **(A)** Oil red O staining of aortic roots from mice treated with Lipistase or vehicle (Control) starting  
6 at 3 weeks of age for 3 months (left panel). **(B)** Oil red O stained aortic roots dissected from  
7 offspring of Lipistase- or vehicle- (Control) treated mice. These offsprings were also treated after  
8 weaning for 3 months. The representative images (left panels) show plaque area in aortic roots.

9

10 **Supplementary Figure 7: Lipistase reduced postprandial hypertriglyceridemia.**

11 Progression of plasma triglyceride levels within 5 hours after administration of 300 µL of soy oil by  
12 gavage (Time 0) to mice fasted for 12 hours after a 3 month Lipistase or vehicle (Control)  
13 treatment.

14

15 **Supplementary Figure 8: Fertility and viability.**

16 **(A & B)** Number of alive or dead pups at 3 months post-weaning after Lipistase or vehicle  
17 (Control) treated parent mice before conception, mothers during gestation and lactation, and  
18 pups after weaning.

19 **Supplementary Table 1: Kown beneficial effects of Lipistase components on lipid metabolism.**

20

| <b>Lipistase components</b>      | <b>Proven actions on lipid metabolism</b>                            |
|----------------------------------|----------------------------------------------------------------------|
| zinc                             | antioxidant activity <sup>1</sup> , vascular protection <sup>2</sup> |
| iron                             | tissue oxygenation <sup>3</sup> , cardiac protection <sup>4</sup>    |
| selenium enriched yeast          | anti-atherosclerosis <sup>3, 5</sup>                                 |
| vitamin B3                       | oxidative metabolism <sup>6</sup>                                    |
| vitamins B9, B6,<br>B12, E and F | anti-atherosclerosis <sup>6</sup>                                    |
| magnesium                        | anti-atherosclerosis <sup>7</sup>                                    |

|                                                                                     |                                                                                                                                                                                                  |
|-------------------------------------------------------------------------------------|--------------------------------------------------------------------------------------------------------------------------------------------------------------------------------------------------|
| fish oil                                                                            | plasma lipid lowering via lipid catabolism promotion <sup>8</sup> ,<br>anti-atherosclerosis <sup>9-11</sup>                                                                                      |
| evening primrose oil                                                                | anti-inflammatory activity <sup>12</sup> , vascular protection <sup>13</sup>                                                                                                                     |
| rapeseed oil                                                                        | plasma lipid lowering <sup>14</sup><br>via lipid catabolism promotion in liver <sup>15, 16</sup>                                                                                                 |
| olive oil                                                                           | antioxidant activity <sup>17</sup>                                                                                                                                                               |
| grapeseed oil                                                                       | activation of mitochondrial oxidation in skeletal muscle <sup>18</sup>                                                                                                                           |
| <i>Fucus vesiculosus</i>                                                            | anti-obesity <sup>19-21</sup> , anti-inflammatory activity <sup>22, 23</sup> ,<br>plasma lipid lowering via lipid absorption inhibition <sup>24</sup> ,<br>antioxidant activity <sup>25-27</sup> |
| <i>Chondrus crispus</i> ,<br><i>Palmaria palmata</i> ,<br><i>Crithmum maritimum</i> | antioxidant activity <sup>28-31</sup>                                                                                                                                                            |
| <i>Vitis vinifera</i>                                                               | anti-atherosclerosis <sup>32-37</sup> ,<br>antioxidant activity <sup>38-42</sup> ,<br>plasma lipid lowering via lipid absorption inhibition <sup>43, 44</sup>                                    |
| <i>Allium sativum</i>                                                               | plasma lipid lowering <sup>45-47</sup> ,<br>via hepatic lipogenesis inhibition <sup>48, 49</sup> ,<br>antioxidant activity <sup>50</sup> , anti-atherosclerosis <sup>51-53</sup>                 |

1

2 1. Bray TM, Bettger WJ. The physiological role of zinc as an antioxidant. *Free Radic Biol*

3 *Med* 1990;**8**:281-291.

4 2. Pearce LL, Wasserloos K, St Croix CM, Gandley R, Levitan ES, Pitt BR. Metallothionein,

5 nitric oxide and zinc homeostasis in vascular endothelial cells. *J Nutr* 2000;**130**:1467S-

6 1470S.

7 3. Reilly C. The Nutritional Trace Metals. Blackwell Publishing Ltd, 2004.

8 4. Lauffer RB. Iron stores and the international variation in mortality from coronary artery

9 disease. *Med Hypotheses* 1991;**35**:96-102.

10 5. Cinemre H, Bilir C, Gokosmanoglu F, Kadakal F. Anti-Saccharomyces cerevisiae

11 antibodies in acute myocardial infarction. *J Investig Med* 2007;**55**:444-449.

- 1 6. McDowell LR. *Vitamins in Animal and Human Nutrition*. Iowa State University Press,  
2 2000.
- 3 7. Ashmead. *Intestinal absorption of metal ions*. Thomas Publisher, 1985.
- 4 8. Rustan AC, Christiansen EN, Drevon CA. Serum lipids, hepatic glycerolipid metabolism  
5 and peroxisomal fatty acid oxidation in rats fed omega-3 and omega-6 fatty acids. *Biochem*  
6 *J* 1992;**283** ( Pt 2):333-339.
- 7 9. Connor WE, DeFrancesco CA, Connor SL. N-3 fatty acids from fish oil. Effects on plasma  
8 lipoproteins and hypertriglyceridemic patients. *Ann N Y Acad Sci* 1993;**683**:16-34.
- 9 10. Lopez D, Moller M, Denicola A, Casos K, Rubbo H, Ruiz-Sanz JI *et al*. Long-chain n-3  
10 polyunsaturated fatty acid from fish oil modulates aortic nitric oxide and tocopherol status  
11 in the rat. *Br J Nutr* 2008;**100**:767-775.
- 12 11. Margioris AN. Fatty acids and postprandial inflammation. *Curr Opin Clin Nutr Metab Care*  
13 2009;**12**:129-137.
- 14 12. Yoshimoto-Furuie K, Yoshimoto K, Tanaka T, Saima S, Kikuchi Y, Shay J *et al*. Effects of  
15 oral supplementation with evening primrose oil for six weeks on plasma essential fatty acids  
16 and uremic skin symptoms in hemodialysis patients. *Nephron* 1999;**81**:151-159.
- 17 13. Jack AM, Keegan A, Cotter MA, Cameron NE. Effects of diabetes and evening primrose oil  
18 treatment on responses of aorta, corpus cavernosum and mesenteric vasculature in rats. *Life*  
19 *Sci* 2002;**71**:1863-1877.
- 20 14. Gulesserian T, Widhalm K. Effect of a rapeseed oil substituting diet on serum lipids and  
21 lipoproteins in children and adolescents with familial hypercholesterolemia. *J Am Coll Nutr*  
22 2002;**21**:103-108.
- 23 15. Christiansen RZ, Christiansen EN, Bremer J. The stimulation of erucate metabolism in  
24 isolated rat hepatocytes by rapeseed oil and hydrogenated marine oil-containing diets.  
25 *Biochim Biophys Acta* 1979;**573**:417-429.

- 1 16. Murata M, Ide T, Hara K. Reciprocal responses to dietary diacylglycerol of hepatic enzymes  
2 of fatty acid synthesis and oxidation in the rat. *Br J Nutr* 1997;**77**:107-121.
- 3 17. Visioli F, Bellomo G, Montedoro G, Galli C. Low density lipoprotein oxidation is inhibited  
4 in vitro by olive oil constituents. *Atherosclerosis* 1995;**117**:25-32.
- 5 18. Chainier F, Roussel D, Georges B, Meister R, Rouanet JL, Duchamp C *et al.* Cold  
6 acclimation or grapeseed oil feeding affects phospholipid composition and mitochondrial  
7 function in duckling skeletal muscle. *Lipids* 2000;**35**:1099-1106.
- 8 19. Bocanegra A, Bastida S, Benedi J, Rodenas S, Sanchez-Muniz FJ. Characteristics and  
9 nutritional and cardiovascular-health properties of seaweeds. *J Med Food* 2009;**12**:236-258.
- 10 20. Maeda H, Tsukui T, Sashima T, Hosokawa M, Miyashita K. Seaweed carotenoid,  
11 fucoxanthin, as a multi-functional nutrient. *Asia Pac J Clin Nutr* 2008;**17 Suppl 1**:196-199.
- 12 21. Moro CO, Basile G. Obesity and medicinal plants. *Fitoterapia* 2000;**71 Suppl 1**:S73-82.
- 13 22. Cardoso ML, Xavier CA, Bezerra MB, Paiva AO, Carvalho MF, Benevides NM *et al.*  
14 Assessment of Zymosan-Induced Leukocyte Influx in a Rat Model using Sulfated  
15 Polysaccharides. *Planta Med* 2009.
- 16 23. Patankar MS, Oehninger S, Barnett T, Williams RL, Clark GF. A revised structure for  
17 fucoidan may explain some of its biological activities. *J Biol Chem* 1993;**268**:21770-21776.
- 18 24. Ikeda I, Tanaka K, Sugano M, Vahouny GV, Gallo LL. Inhibition of cholesterol absorption  
19 in rats by plant sterols. *J Lipid Res* 1988;**29**:1573-1582.
- 20 25. Lee S, Lee YS, Jung SH, Kang SS, Shin KH. Anti-oxidant activities of fucosterol from the  
21 marine algae *Pelvetia siliquosa*. *Arch Pharm Res* 2003;**26**:719-722.
- 22 26. Ruperez P, Ahrazem O, Leal JA. Potential antioxidant capacity of sulfated polysaccharides  
23 from the edible marine brown seaweed *Fucus vesiculosus*. *J Agric Food Chem*  
24 2002;**50**:840-845.

- 1 27. Zaragoza MC, Lopez D, M PS, Poquet M, Perez J, Puig-Parellada P *et al.* Toxicity and  
2 antioxidant activity in vitro and in vivo of two *Fucus vesiculosus* extracts. *J Agric Food*  
3 *Chem* 2008;**56**:7773-7780.
- 4 28. Matsuhira B, Urzua CC. Heterogeneity of carrageenans from *Chondrus crispus*.  
5 *Phytochemistry* 1992;**31**:531-534.
- 6 29. Meot-Duros L, Magne C. Antioxidant activity and phenol content of *Crithmum maritimum*  
7 *L.* leaves. *Plant Physiol Biochem* 2009;**47**:37-41.
- 8 30. Yuan H, Song J, Zhang W, Li X, Li N, Gao X. Antioxidant activity and cytoprotective  
9 effect of kappa-carrageenan oligosaccharides and their different derivatives. *Bioorg Med*  
10 *Chem Lett* 2006;**16**:1329-1334.
- 11 31. Yuan YV, Carrington MF, Walsh NA. Extracts from dulse (*Palmaria palmata*) are effective  
12 antioxidants and inhibitors of cell proliferation in vitro. *Food Chem Toxicol* 2005;**43**:1073-  
13 1081.
- 14 32. Andriambelason E, Kleschyov AL, Muller B, Beretz A, Stoclet JC, Andriantsitohaina R.  
15 Nitric oxide production and endothelium-dependent vasorelaxation induced by wine  
16 polyphenols in rat aorta. *Br J Pharmacol* 1997;**120**:1053-1058.
- 17 33. Diebolt M, Bucher B, Andriantsitohaina R. Wine polyphenols decrease blood pressure,  
18 improve NO vasodilatation, and induce gene expression. *Hypertension* 2001;**38**:159-165.
- 19 34. Ekshyyan VP, Hebert VY, Khandelwal A, Dugas TR. Resveratrol inhibits rat aortic vascular  
20 smooth muscle cell proliferation via estrogen receptor dependent nitric oxide production. *J*  
21 *Cardiovasc Pharmacol* 2007;**50**:83-93.
- 22 35. Lee B, Moon SK. Resveratrol inhibits TNF-alpha-induced proliferation and matrix  
23 metalloproteinase expression in human vascular smooth muscle cells. *J Nutr*  
24 2005;**135**:2767-2773.

- 1 36. Leifert WR, Abeywardena MY. Cardioprotective actions of grape polyphenols. *Nutr Res*  
2 2008;**28**:729-737.
- 3 37. Perez-Jimenez J, Saura-Calixto F. Grape products and cardiovascular disease risk factors.  
4 *Nutr Res Rev* 2008;**21**:158-173.
- 5 38. Cestaro B, Simonetti P, Cervato G, Brusamolino A, Gatti P, Testolin G. Red wine effects on  
6 peroxidation indexes of rat plasma and erythrocytes. *Int J Food Sci Nutr* 1996;**47**:181-189.
- 7 39. Goni I, Brenes A, Centeno C, Viveros A, Saura-Calixto F, Rebole A *et al.* Effect of dietary  
8 grape pomace and vitamin E on growth performance, nutrient digestibility, and  
9 susceptibility to meat lipid oxidation in chickens. *Poult Sci* 2007;**86**:508-516.
- 10 40. Rodrigo R, Rivera G, Orellana M, Araya J, Bosco C. Rat kidney antioxidant response to  
11 long-term exposure to flavonol rich red wine. *Life Sci* 2002;**71**:2881-2895.
- 12 41. Roig R, Cascon E, Arola L, Blade C, Salvado MJ. Moderate red wine consumption protects  
13 the rat against oxidation in vivo. *Life Sci* 1999;**64**:1517-1524.
- 14 42. Simonetti P, Ciappellano S, Gardana C, Bramati L, Pietta P. Procyanidins from *Vitis*  
15 *vinifera* seeds: in vivo effects on oxidative stress. *J Agric Food Chem* 2002;**50**:6217-6221.
- 16 43. Pal S, Naissides M, Mamo J. Polyphenolics and fat absorption. *Int J Obes Relat Metab*  
17 *Disord* 2004;**28**:324-326.
- 18 44. Tebib K, Besancon P, Rouanet JM. Dietary grape seed tannins affect lipoproteins,  
19 lipoprotein lipases and tissue lipids in rats fed hypercholesterolemic diets. *J Nutr*  
20 1994;**124**:2451-2457.
- 21 45. Kojuri J, Vosoughi AR, Akrami M. Effects of anethum graveolens and garlic on lipid  
22 profile in hyperlipidemic patients. *Lipids Health Dis* 2007;**6**:5.
- 23 46. Sobenin IA, Andrianova IV, Demidova ON, Gorchakova T, Orekhov AN. Lipid-lowering  
24 effects of time-released garlic powder tablets in double-blinded placebo-controlled  
25 randomized study. *J Atheroscler Thromb* 2008;**15**:334-338.

- 1 47. Yeh YY, Lin, R. I., Yeh, S. M. & Evens, S. Garlic reduces plasma cholesterol in  
2 hypercholesterolemic men maintaining habitual diets. In: T. OHOTTJWST, ed. Food  
3 Factors for Cancer Prevention. Tokyo: Springer, 1997:226-230.
- 4 48. Yeh YY, Liu L. Cholesterol-lowering effect of garlic extracts and organosulfur compounds:  
5 human and animal studies. *J Nutr* 2001;**131**:989S-993S.
- 6 49. Yeh YY, Yeh SM. Garlic reduces plasma lipids by inhibiting hepatic cholesterol and  
7 triacylglycerol synthesis. *Lipids* 1994;**29**:189-193.
- 8 50. Ide N, Lau BH. Garlic compounds minimize intracellular oxidative stress and inhibit  
9 nuclear factor-kappa b activation. *J Nutr* 2001;**131**:1020S-1026S.
- 10 51. Campbell JH, Efendy JL, Smith NJ, Campbell GR. Molecular basis by which garlic  
11 suppresses atherosclerosis. *J Nutr* 2001;**131**:1006S-1009S.
- 12 52. Lau BH. Suppression of LDL oxidation by garlic. *J Nutr* 2001;**131**:985S-988S.
- 13 53. Slowing K, Ganado P, Sanz M, Ruiz E, Tejerina T. Study of garlic extracts and fractions on  
14 cholesterol plasma levels and vascular reactivity in cholesterol-fed rats. *J Nutr*  
15 2001;**131**:994S-999S.

16  
17  
18



1 **Supplementary Table 2: Primers used for real-time RT-qPCR**

| <b>Gene</b>          | <b>Forward (3'-5')</b>                 | <b>Reverse (3'-5')</b>  |
|----------------------|----------------------------------------|-------------------------|
| CD36                 | CAT.NO. QT01058253 (Qiagen quantitect) |                         |
| ACOX1                | CAT.NO. QT01775851 (Qiagen quantitect) |                         |
| BFE                  | TGTTCTTGGCTTGGGAACG                    | TCCCCACCCTTGCAAAAAG     |
| UCP3                 | CAT.NO. QT00115339 (Qiagen quantitect) |                         |
| TNF $\alpha$         | CAT.NO. QT00104006 (Qiagen quantitect) |                         |
| MCP-1                | CAT.NO. QT00167832 (Qiagen quantitect) |                         |
| MIP1- $\alpha$       | TTCTCTGTACCATGACACTCTGC                | CGTGGAATCTTCCGGCTGTAG   |
| SREBP-1c             | CAGCTCAGAGCCGTGGTGA                    | TTGATAGAAGACCGGTAGCGC   |
| ACC1                 | ATTGGGCACCCCAGAGCTA                    | CCCCTCCTTCAACTTGCT      |
| FAS                  | CCTCTGATCAGTGGCTCCTC                   | GGATTCGGGAATACAAGTGGC   |
| SCD1                 | AGATCTCCAGTTCTTACACGACCAC              | GACGGATGTCTTCTTCCAGGTG  |
| Elovl3               | CAT.NO. QT00115675 (Qiagen quantitect) |                         |
| DGAT1                | CGTGGGCGACGGCTACT                      | GAAACCACTGTCTGAGCTGAACA |
| DGAT2                | GCCCCGACGAAAACA                        | GTCTTGGAGGGCTGAGAGGAT   |
| ADFP                 | CTACGACGACACCGAT                       | CATTGCGGAATACGGAG       |
| PPAR $\gamma$ 2      | GCCCACGAACTTCGGAATC                    | TGCGAGTGGTCTTCCATCAC    |
| CEBP $\alpha$        | GAGCTGAGTGAGGCTCTCATTCT                | TGGGAGGCAGACGAAAAAAC    |
| LPL                  | AGTGGCCGAGAGCGAGAAC                    | CCACCTCCGTGTAAATCAAGAAG |
| aP2                  | CCGCAGACGACAGGAAGG                     | AGGGCCCCGCCATCT         |
| Leptin               | AACCCTCATCAAGACCATTGTCA                | CCTCTGCTTGGCGGATACC     |
| Adiponectin          | GCACTGGCAAGTTCTACTGCAA                 | GTAGGTGAAGAGAACGGCCTTGT |
| Resistin             | GCTGCTGCCAAGGCTGAT                     | TCTCCTTCCACCATGTAGTTTCC |
| Adipsin              | GCCTGATGTCCTGCATCAACT                  | GCGCAGATTGCAGGTTGTC     |
| Cyclo (housekeeping) | TTTGACTTGCGGGCATT                      | GGACGCTCTCCTGAGCTACAGA  |
| 36B4 (housekeeping)  | ACCTCCTTCTTCCAGGCTTT                   | CCCACCTTGTCTCCAGTCTTT   |

2

3

---

4 CD36: cluster of differentiation 36; ACOX1: peroxisomal acyl-coenzyme A oxidase 1; TNF $\alpha$ :

5 tumor necrosis factor alpha; MCP-1: monocyte chemotactic protein-1; MIP1- $\alpha$ : macrophage

6 inflammatory protein 1-alpha; SREBP-1c: sterol regulatory element-binding protein 1-c; FAS: fatty

- 1 acid synthase; SCD1: stearoyl-CoA desaturase 1; Elovl3: elongation of very long chain fatty acids
- 2 3; DGAT1: diglyceride acyltransferase 1; DGAT2: diglyceride acyltransferase 2; ADFP: adipose
- 3 differentiation-related protein; PPAR $\gamma$ 2: peroxisome-proliferator activated receptor gamma 2;
- 4 CEBP $\alpha$ : CCAAT/enhancer-binding protein alpha; LPL: lipoprotein lipase; aP2: adipocyte protein
- 5 2; Cyclo: cyclophilin B; 36B4: acidic ribosomal phosphoprotein P0.
- 6

**A**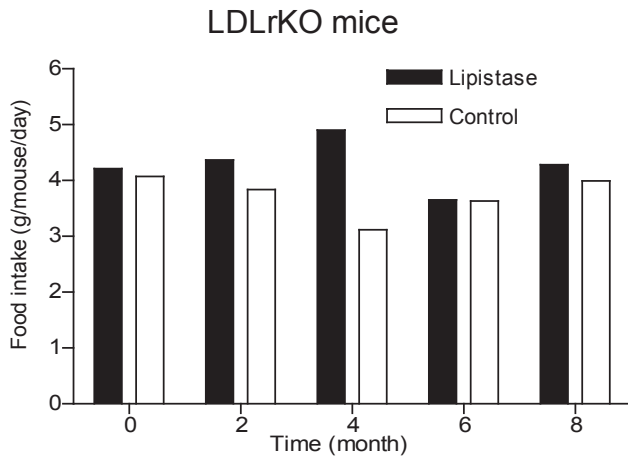**B**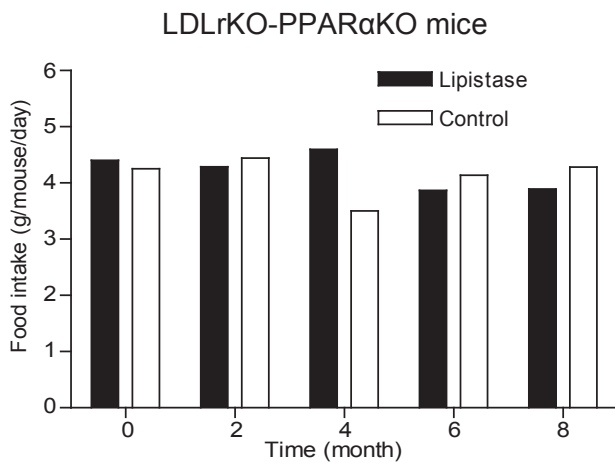**C**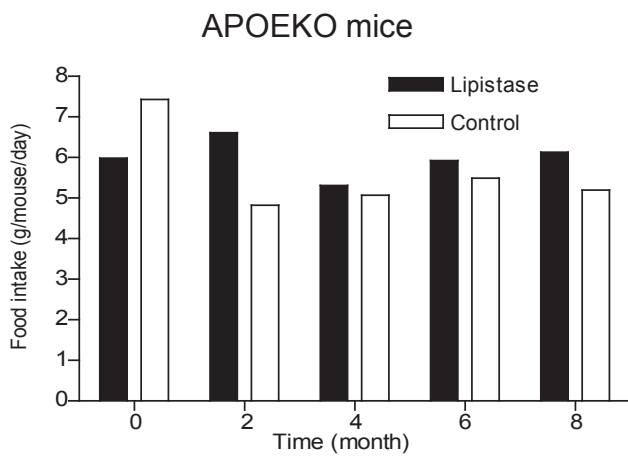

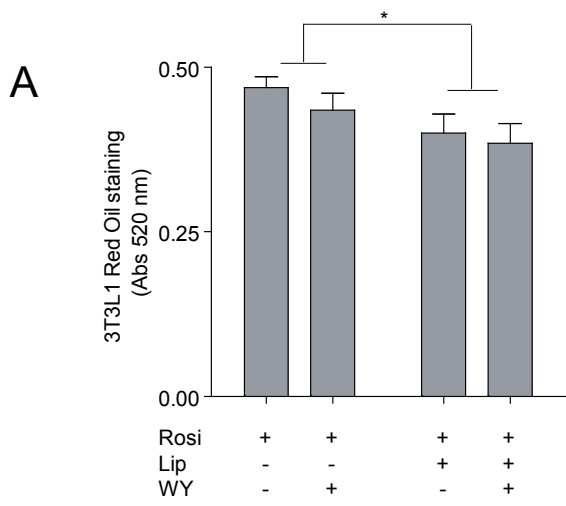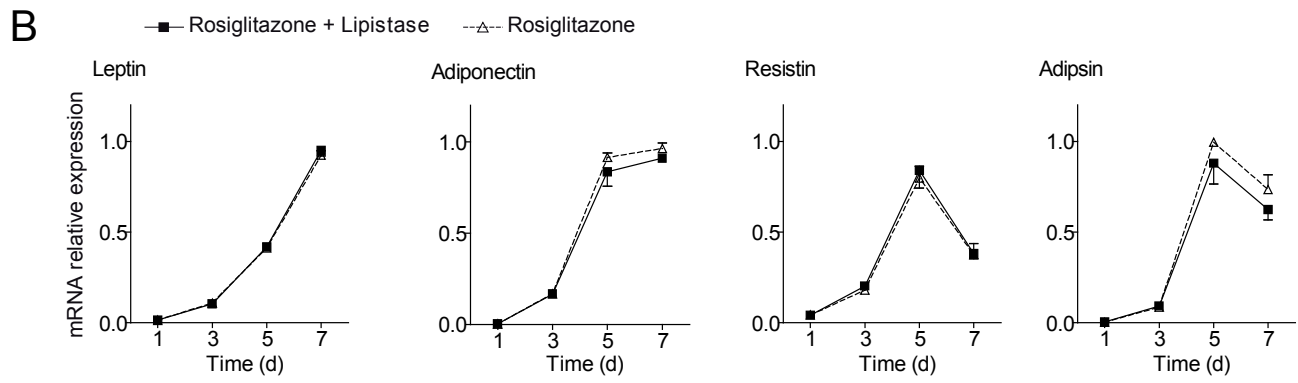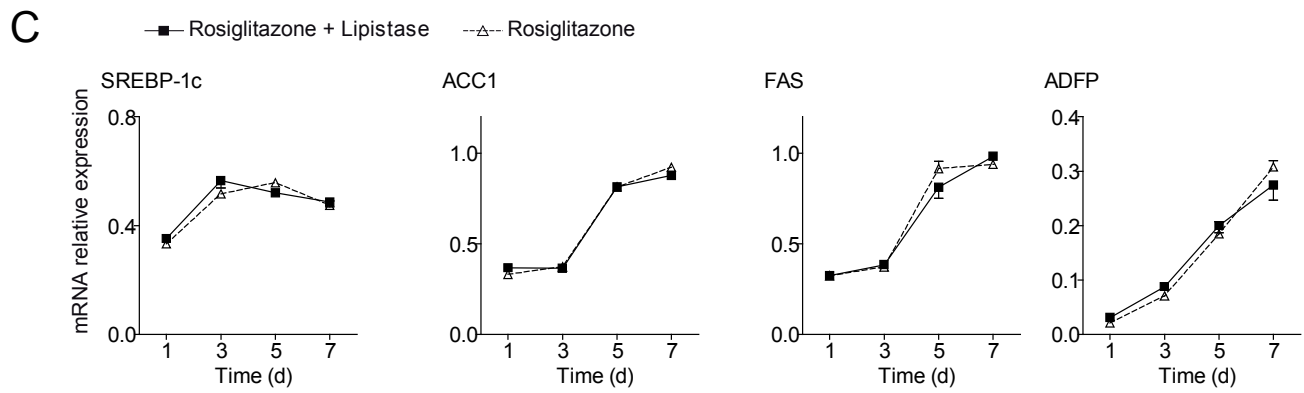

Supplementary Figure 2

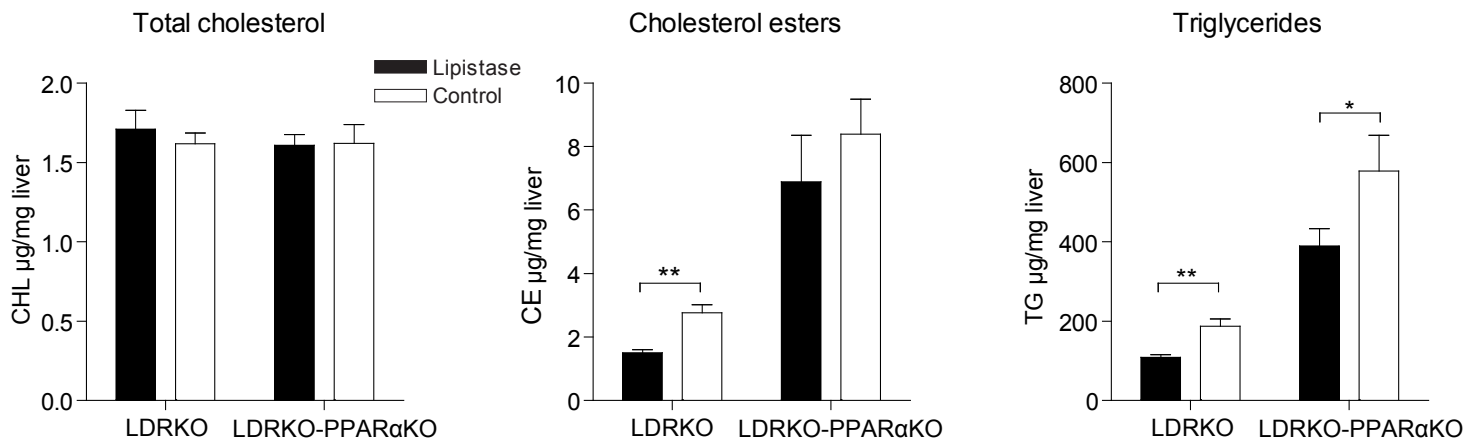

Supplementary Figure 3

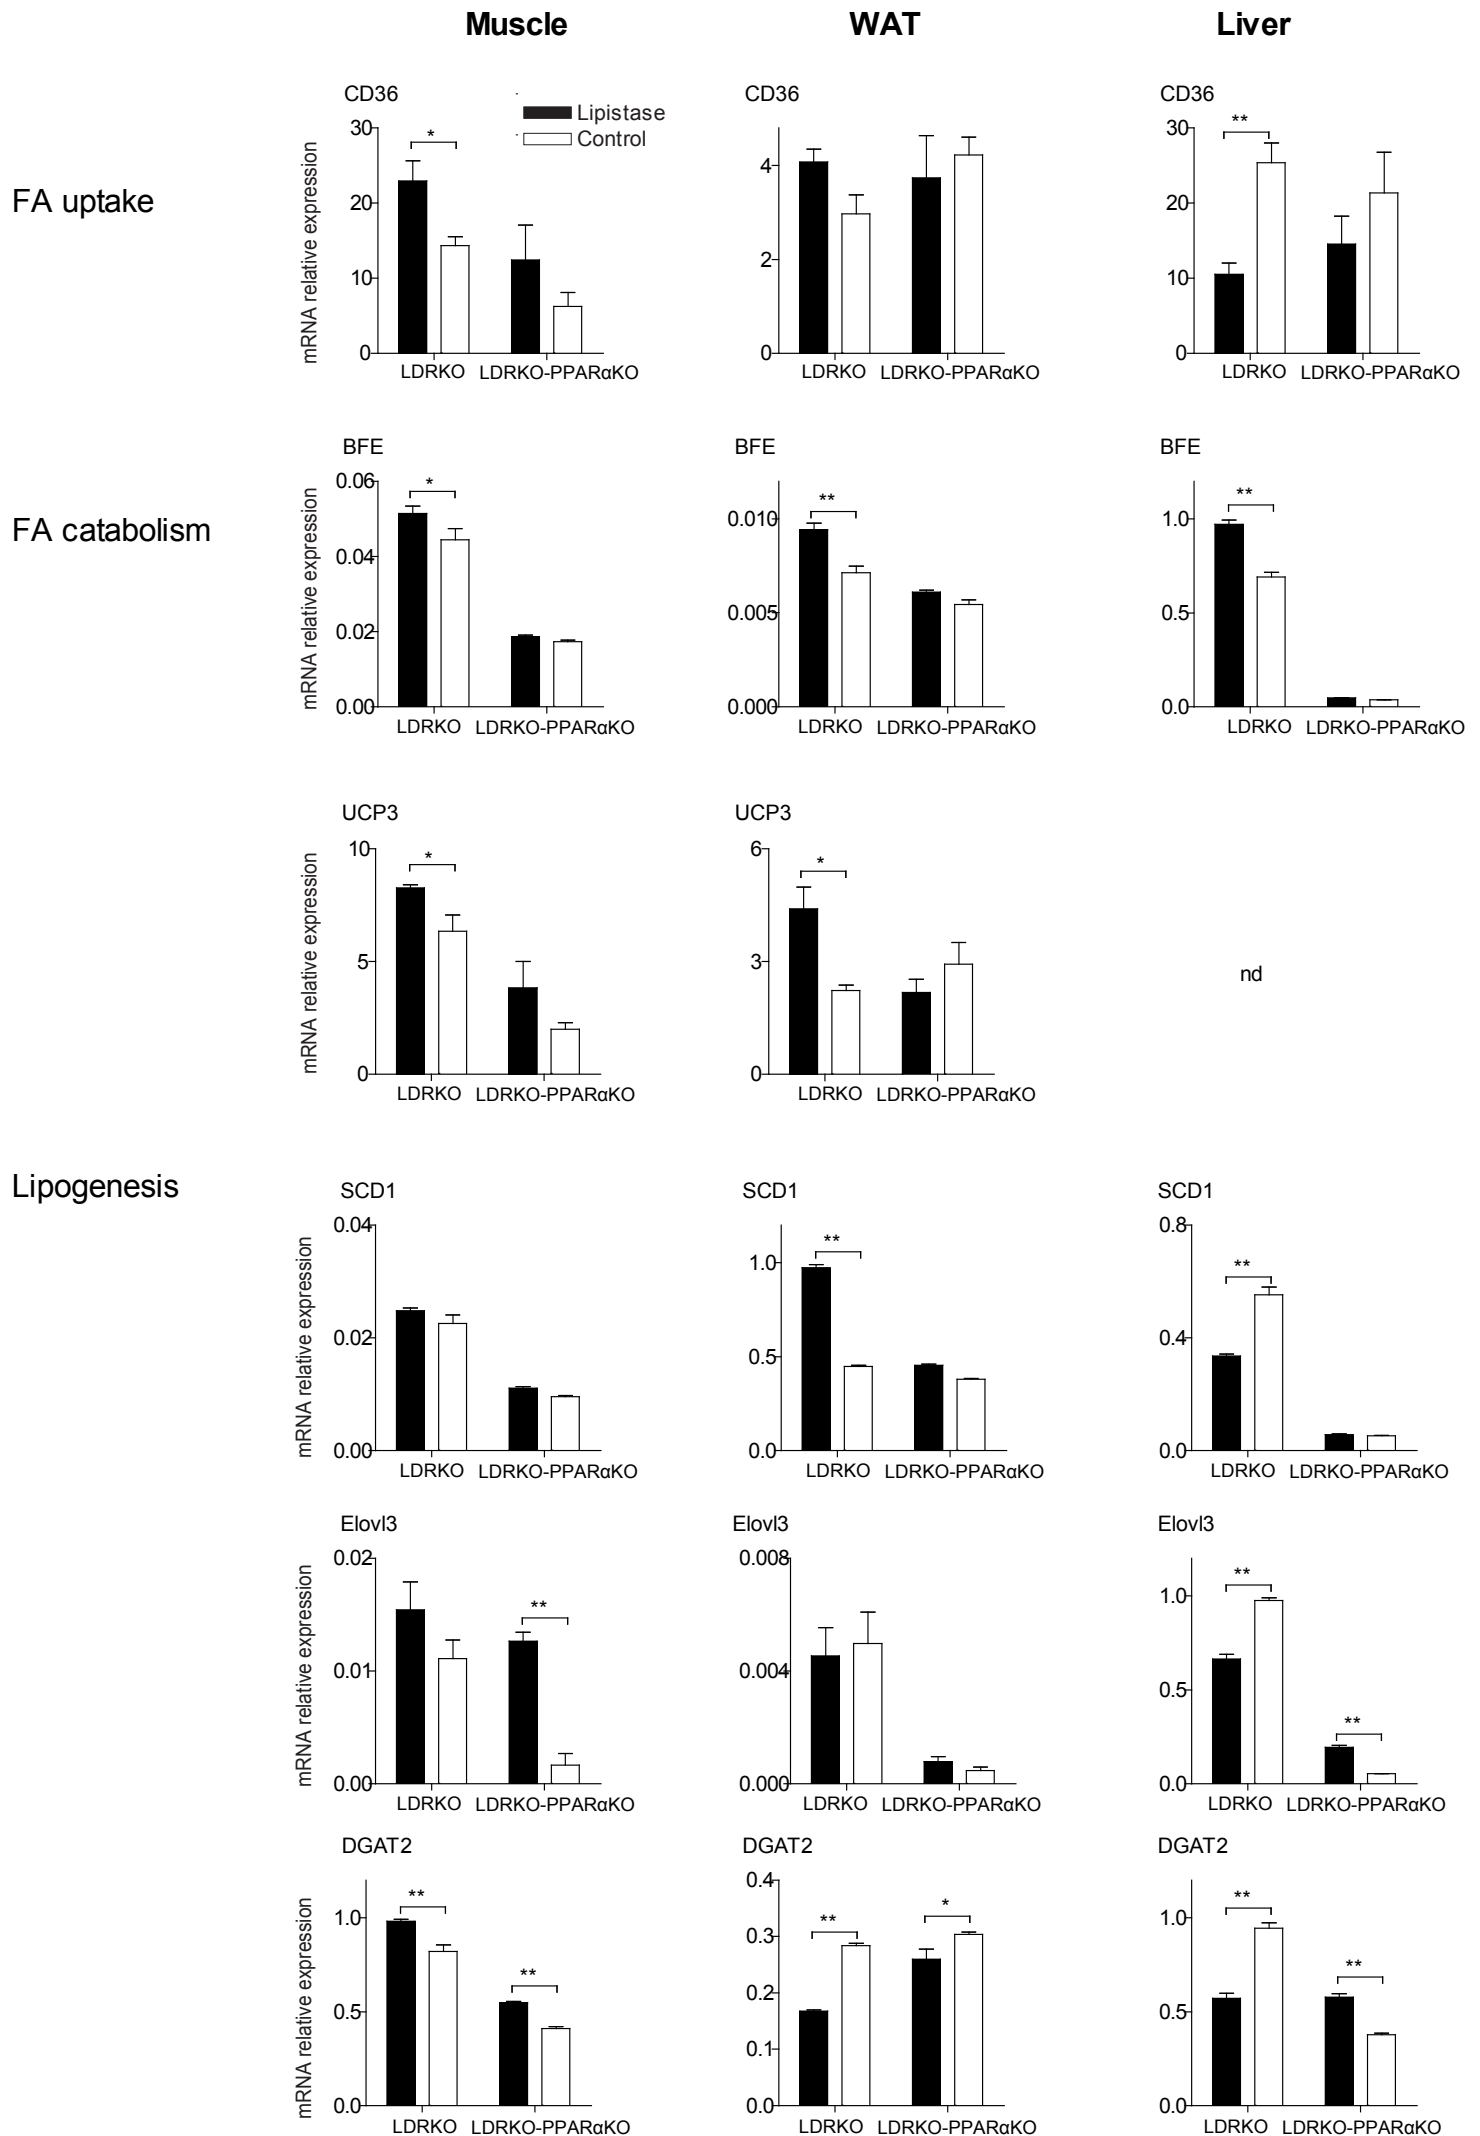

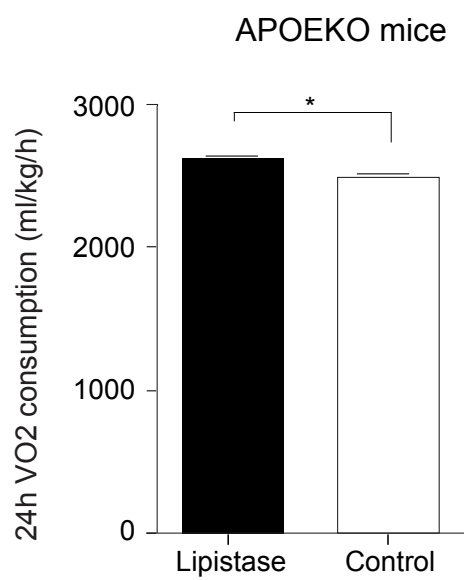

Supplementary Figure 5

A

Control

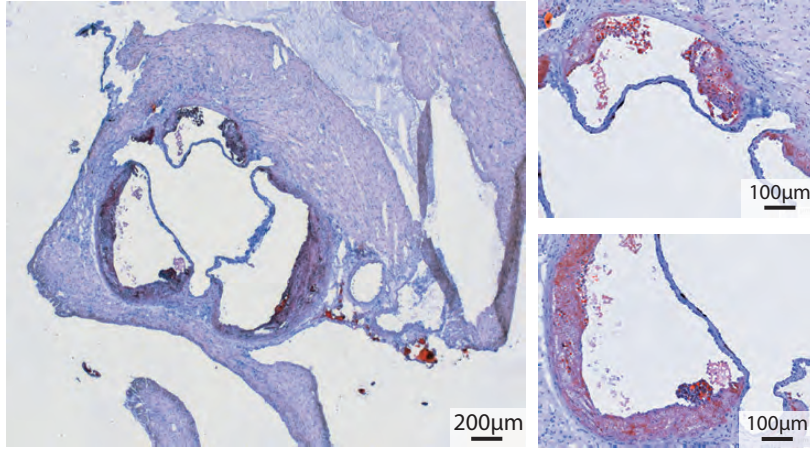

Lipistase

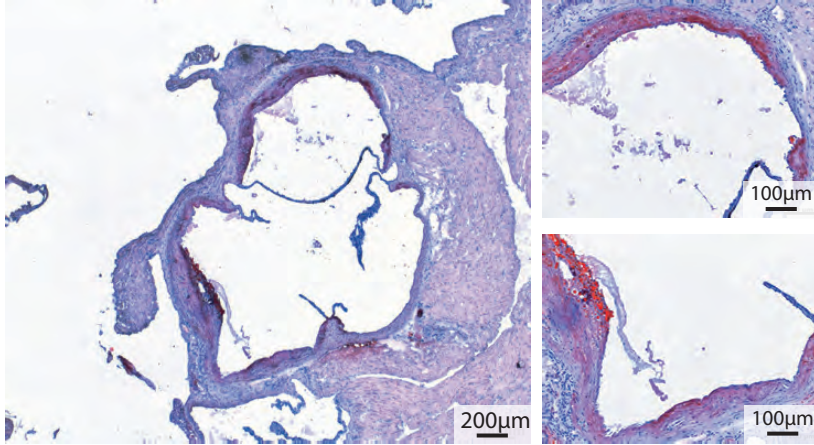

B

Control

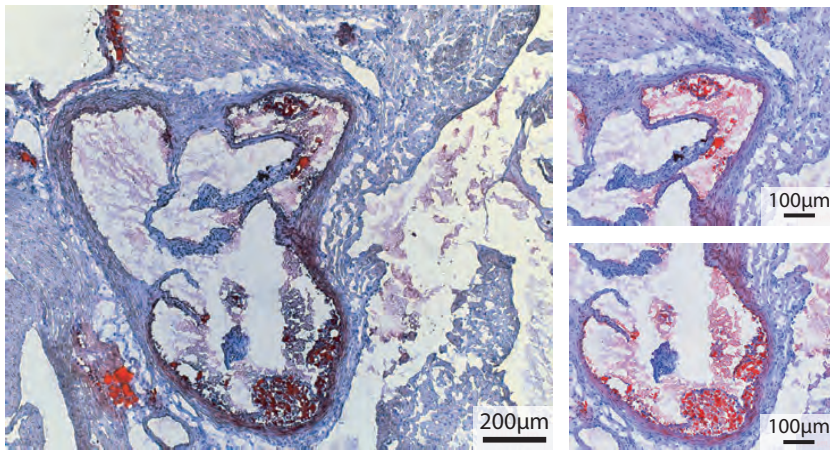

Lipistase

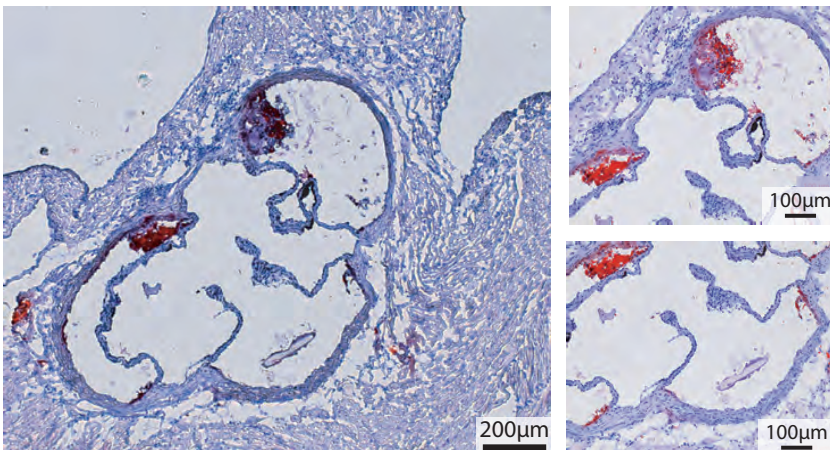



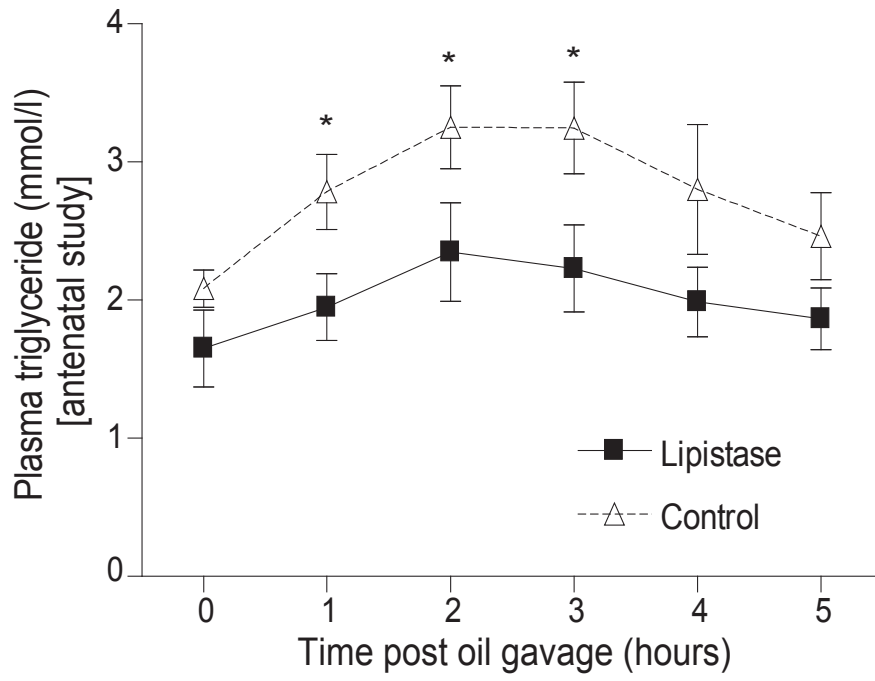

Supplementary Figure 7

**A**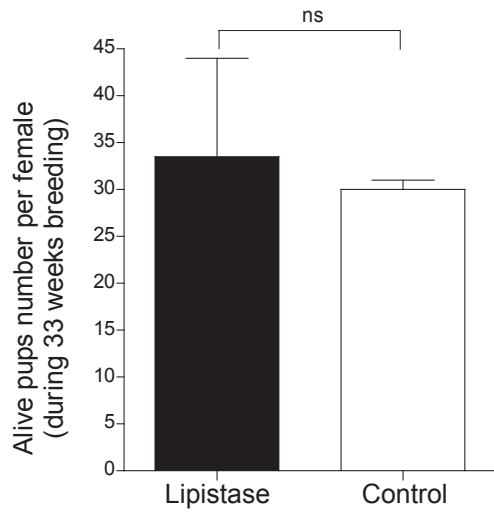**B**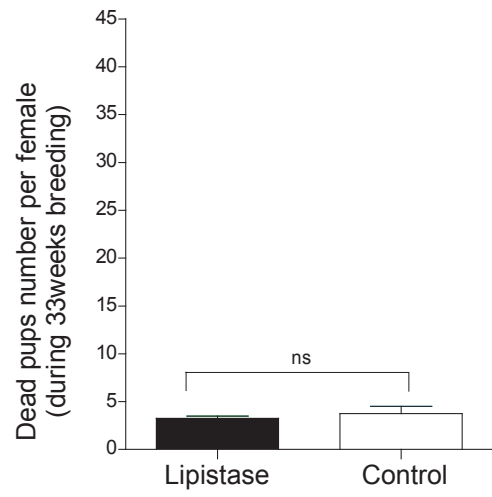

Supplementary Figure 8
